# Supplementary material for: Interference underlies attenuation upon relearning in sensorimotor adaptation
Source: PubMed Central journal article supplement — bioRxiv. 2024 Jun 1:2024.05.27.596118. Preprint. [Version 1] doi: 10.1101/2024.05.27.596118 (PMC11160603; doi:10.1101/2024.05.27.596118), 2024-06-01
Supplement: media-1.pdf [file media-1.pdf]

# **Interference underlies attenuation upon relearning in sensorimotor adaptation - Supplementary**

Guy Avraham\* and Richard B Ivry

Department of Psychology and Helen Wills Neuroscience Institute, University of California, Berkeley, Berkeley, CA 94720, USA

\* Corresponding author

E-mail: [guyavraham@berkeley.edu](mailto:guyavraham@berkeley.edu)

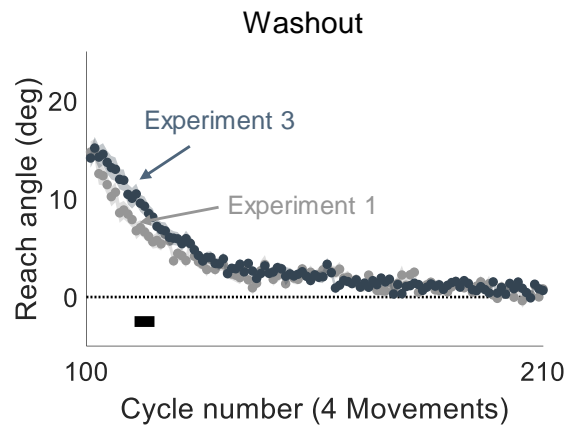

**Fig S1. Early washout in response to a contingent visuomotor rotation that decreases in a gradual manner (Experiment 3) was slower than washout driven by a reversed clamp (Experiment 1).**

Overlaid time courses of mean reach angle during the washout block for Experiment 1 (gray) and Experiment 3 (blue), with the data averaged within each cycle of four movements. The horizontal black bar during the early phase of the washout block denotes a cluster that showed a significant difference between the two experiments, suggesting that the rate of de-adaptation during washout was lower in response to the gradual, contingent rotation schedule that we used compared to a reversed clamp.

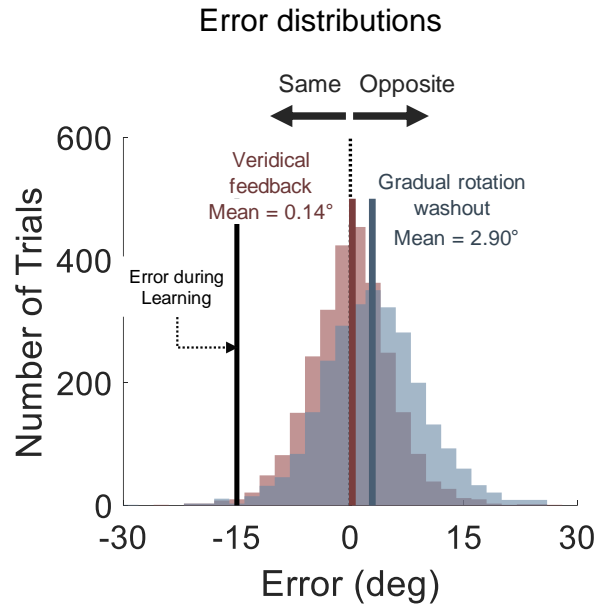

**Fig S2. Comparison of error distributions observed in response to the gradual rotation washout or veridical feedback.**

Overlaid distributions of errors experienced during the non-zero rotation phase of the washout block in Experiment 3 ([mean  $\pm$  standard deviation],  $2.90^\circ \pm 10.1^\circ$ , blue) and with veridical feedback ( $0.14^\circ \pm 10.6^\circ$ , red). The latter data was obtained from a different group of participants (N=44) which experienced a 195-cycle block with veridical feedback. We used the data from cycles 100-116, matching the phase of the experiment and the mean number of trials used for calculating the distribution in Experiment 3.
